# Supplementary material for: Identification of cis-acting determinants mediating the unconventional secretion of tau
Source: PubMed Central journal article supplement (PMC8217235; doi:10.1038/s41598-021-92433-3), 2021-06-21

1 **Identification of *cis*-acting determinants mediating the unconven-**  
2 **tional secretion of tau**

3

4

5 Taxiarchis Katsinelos<sup>1,2,3</sup>, William A. McEwan<sup>3</sup>, Thomas R. Jahn<sup>2</sup>, Walter Nickel<sup>1</sup>

6

7 <sup>1</sup>Heidelberg University Biochemistry Center (BZH), INF 328, 69120 Heidelberg, Ger-  
8 many.

9 <sup>2</sup>Schaller Research Group at the University of Heidelberg and the DKFZ, Proteosta-  
10 sis in Neurodegenerative Disease (B180), INF 581, 69120 Heidelberg, Germany.

11 <sup>3</sup>Department of Clinical Neurosciences, UK Dementia Research Institute at the Uni-  
12 versity of Cambridge, Cambridge, UK

13

14 Correspondence and requests for materials should be addressed to T.K.  
15 ([tk537@cam.ac.uk](mailto:tk537@cam.ac.uk))

16

17

18 **Supplementary information**

19

20

21

22

23

24

25

26

27

28

29

30

31

32

**Figure S1**

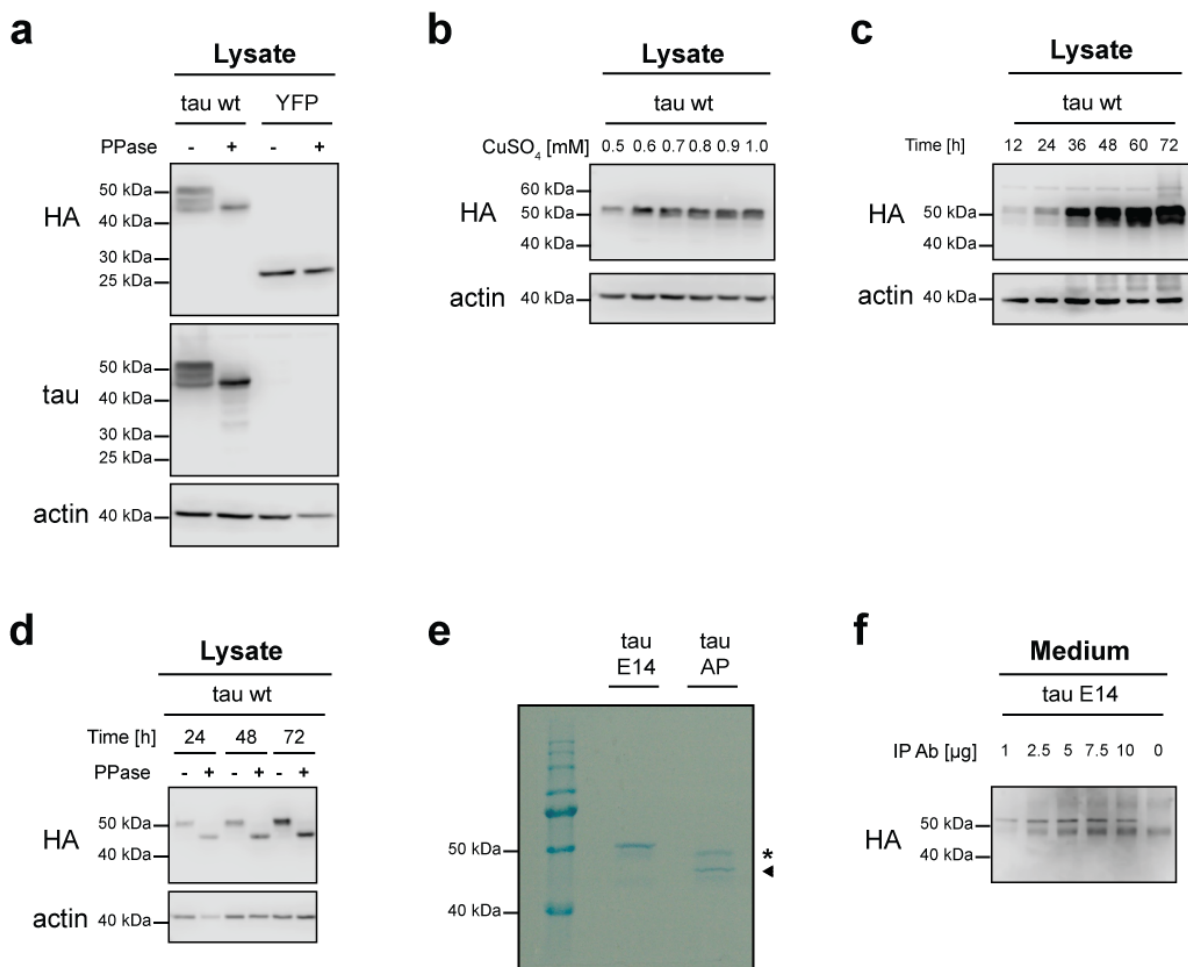

33 **Figure S1. Characterization of a novel *Drosophila* neuronal cell culture system**  
34 **for tau secretion.**

35 **(a)** Lysates from BG2-c6 neuronal cells expressing C-terminally 3xHA-tagged ver-  
36 sions of tau wt and YFP were dephosphorylated and then blotted against HA and  
37 pan-tau. Blotting against actin was used as loading control. **(b)** Increasing amounts of  
38 CuSO<sub>4</sub> were employed for inducing the expression of tau wt and the lysates were  
39 blotted against HA and actin. **(c)** Cells expressing tau wt were lysed at different time  
40 points and lysates were blotted against HA and actin. **(d)** Phosphatase-treated and  
41 untreated lysates from BG2-c6 cells expressing tau wt for different time intervals  
42 were blotted against HA and actin. **(e)** BG2-c6 cells expressing either tau E14 or tau  
43 AP were lysed and then subjected to immunoprecipitation. The eluted tau fractions  
44 were then analysed through SDS-PAGE and subsequently stained with Coomassie.  
45 The asterisk and arrow indications correspond to the P- and non-P band of tau AP,  
46 respectively. **(f)** Conditioned medium from BG2-c6 neuronal cells expressing tau E14  
47 were equally distributed and subsequently subjected to immunoprecipitation with in-  
48 creasing amounts of the pan-tau KJ9A antibody. The eluted fractions were then im-  
49 munoblotted using an antibody against the HA-tag.

50

51

52

53

54

55

56

57

58

59

60

61

62

63

64

65

**Figure S2**

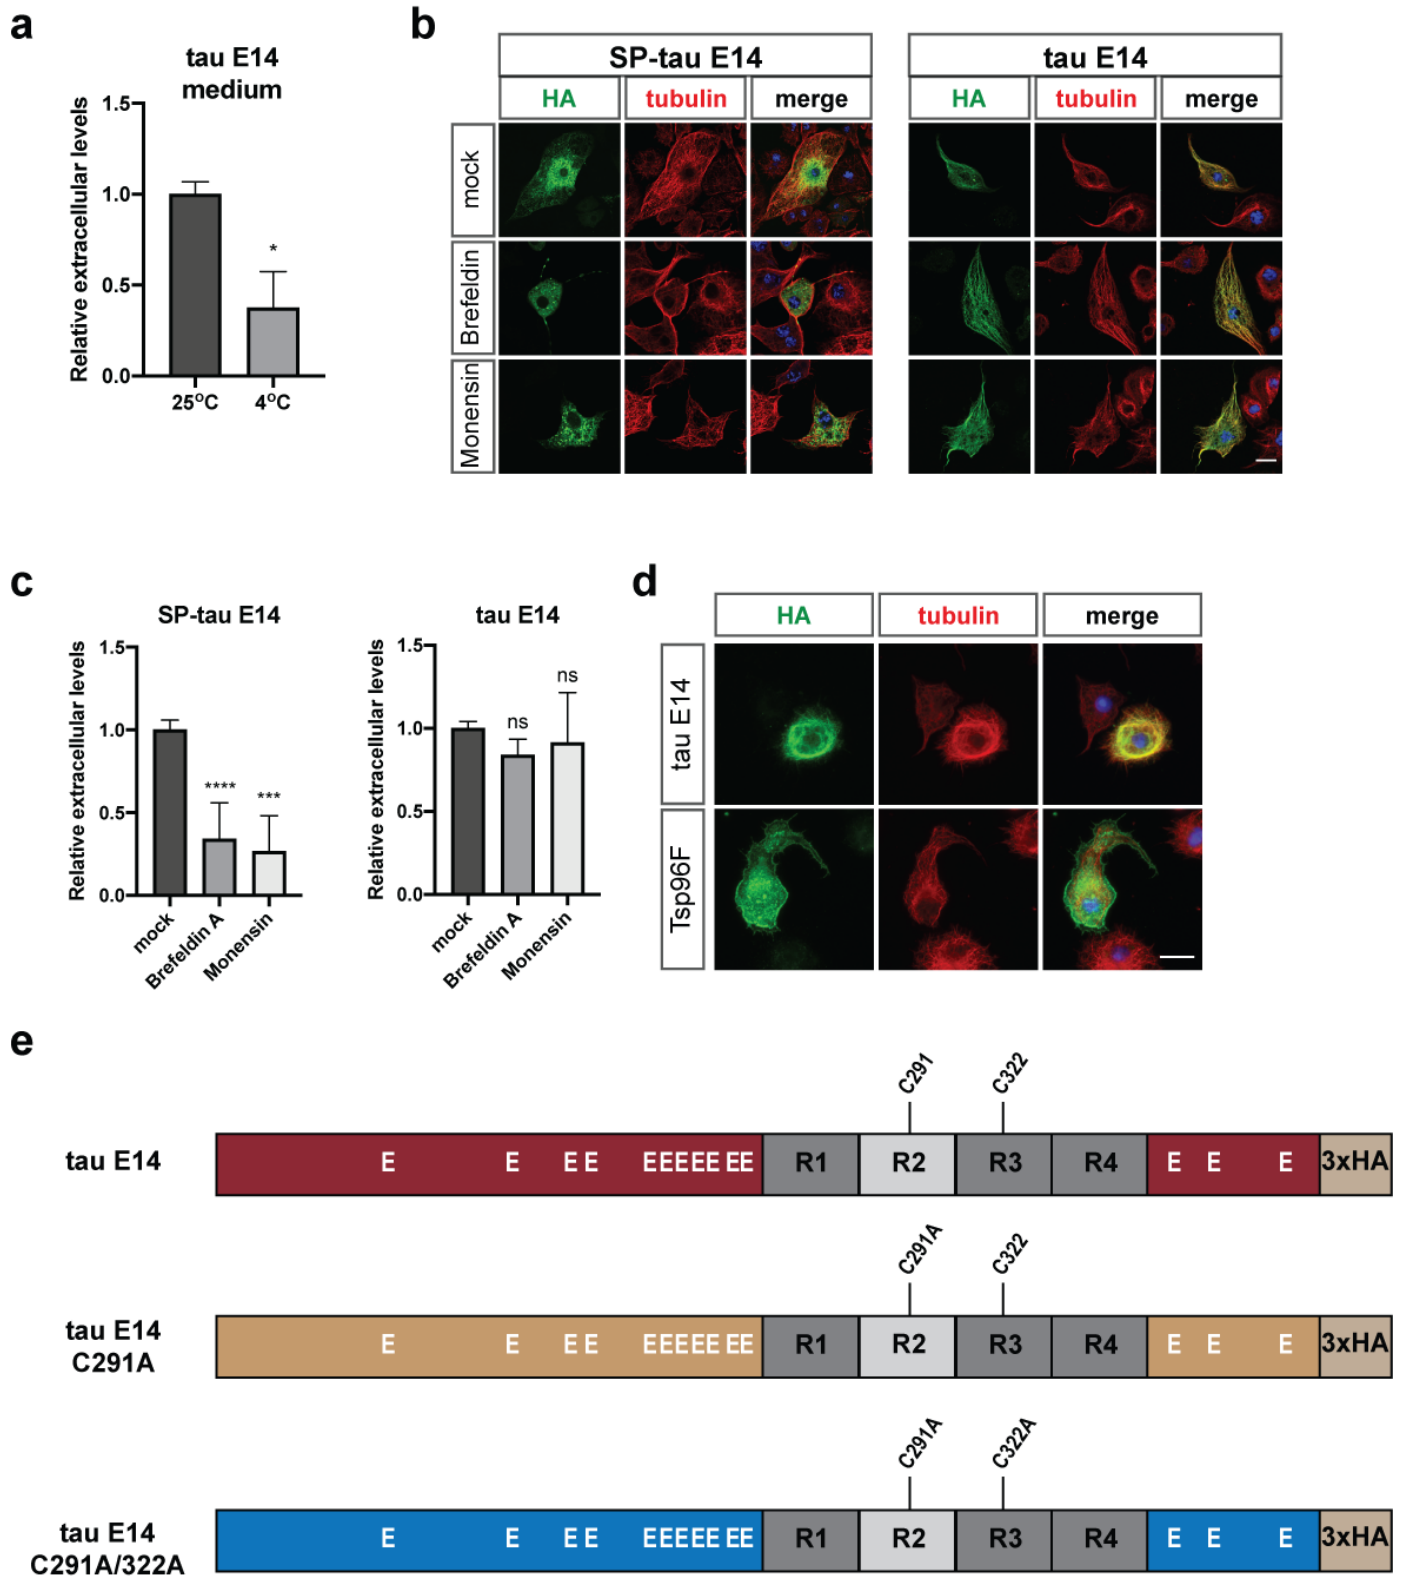

66 **Figure S2. The secretion of tau is not related to the canonical ER/Golgi secre-**  
67 **tory pathway.**

68 **(a)** The secreted amounts from cells cultured for 6 h either at 25 °C or at 4 °C were  
69 densitometrically quantified, normalized to the intracellular levels, and subsequently  
70 compared to the normal culturing conditions. The data represent mean values  $\pm$  s.d.  
71 derived from n = 3 biological replicates and were subjected to unpaired t test that was  
72 followed by Welch's correction. **(b)** Cells transfected with SP-tau E14 and tau E14  
73 were treated with Brefeldin A and Monensin for 6 h before fixation and immunofluo-  
74 rescence staining was performed for tau, tubulin, and nucleus with antibodies against  
75 HA, tubulin, and Hoechst dye respectively (scale bar, 15  $\mu$ m). **(c)** The densitometri-  
76 cally quantified secreted protein levels for every condition were initially normalized to  
77 the intracellular amounts and subsequently compared to the mock treatment. The  
78 data represent mean values  $\pm$  s.d. derived from at least 3 biological replicates and  
79 were subjected to one-way ANOVA, followed by Tukey's post hoc test. **(d)** HA and  
80 tubulin antibodies were employed for detection of tau E14 or Tsp96F and tubulin, re-  
81 spectively, whereas Hoechst was used for nuclear staining (scale bar, 15  $\mu$ m). **(e)**  
82 Schematic illustration of the tau E14 and the cysteine mutant tau variants generated  
83 and employed in the study. The light gray colouring of R2 indicates the domain that is  
84 absent in the 3R tau isoforms.

85  
86  
87  
88  
89  
90  
91  
92  
93  
94  
95  
96  
97

# Figure S3

**a**

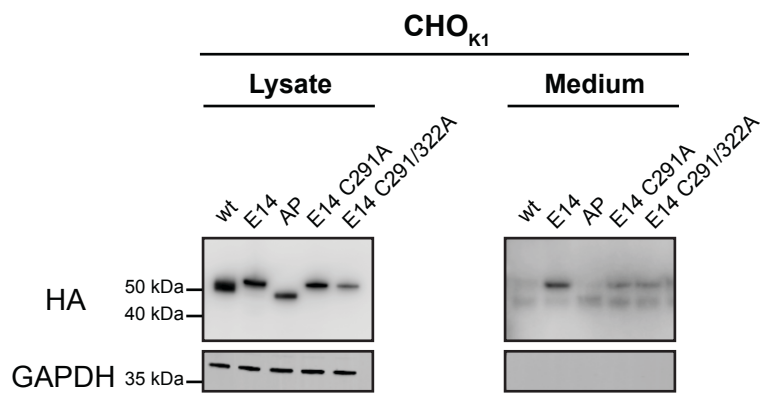

**b**

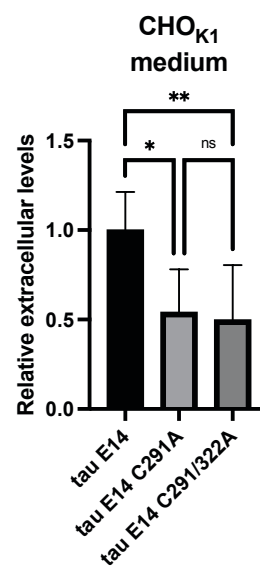

**c**

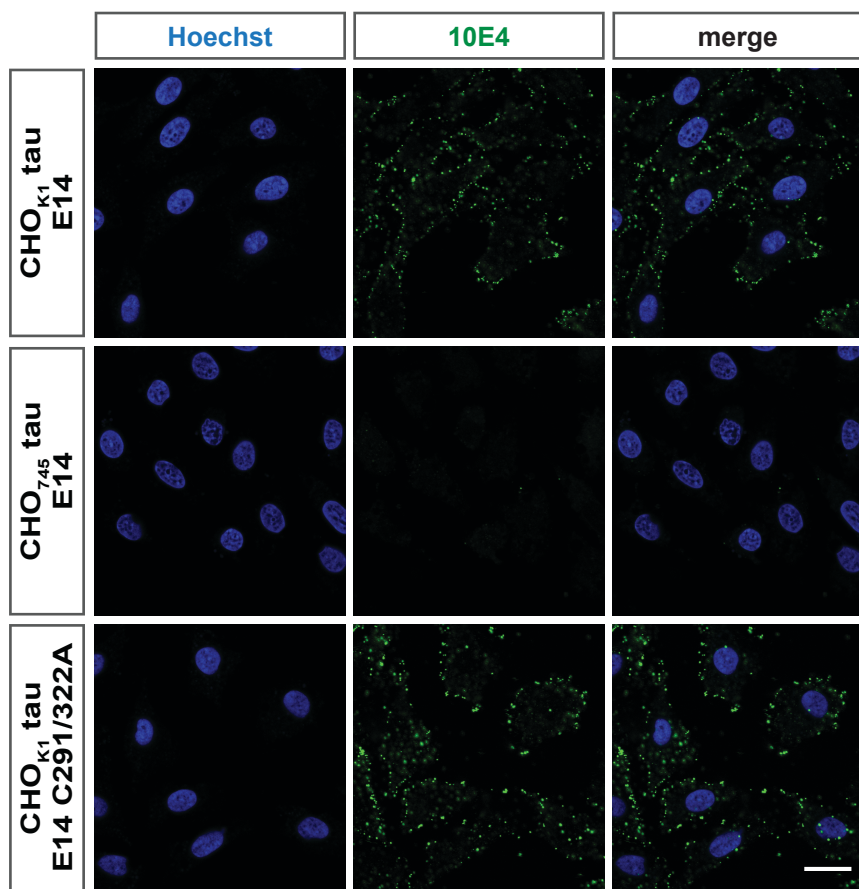

**d**

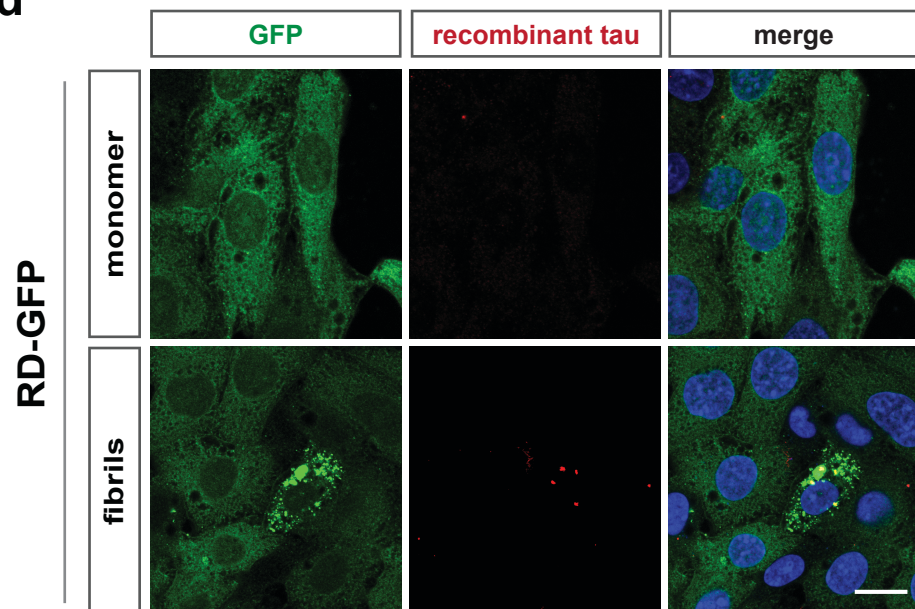

**e**

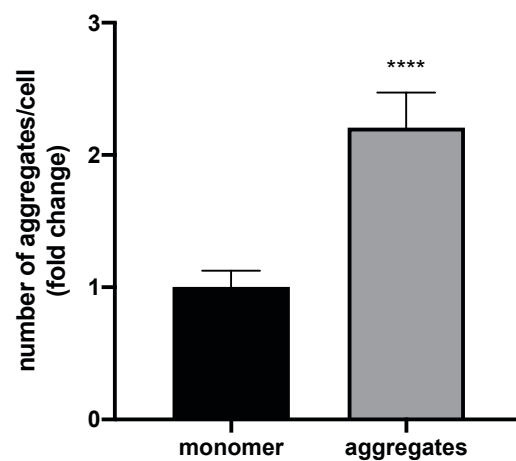

98 **Figure S3. Cysteine mutants tau E14 expression in CHO<sub>K1</sub> cells and validation**  
99 **of seeding competence in biosensor cell line.**

100 **(a)** CHO<sub>K1</sub> cells expressing the different variants were lysed and the conditioned me-  
101 dium was subjected to immunoprecipitation. Both fractions were immunoblotted  
102 against the HA-tag, while GAPDH was used as loading and quality control. **(b)** The  
103 densitometrically quantified secreted levels were initially normalized to the intracellular  
104 levels and subsequently compared to tau E14. The data represent mean values  $\pm$  s.d.  
105 derived from at least 4 biological replicates and were statistically compared using one-  
106 way ANOVA, followed by Tukey's post hoc test. **(c)** Non-permeabilized fixed cells ex-  
107 pressing tau E14 in normal and deficient sulfated proteoglycans background (CHO<sub>K1</sub>  
108 and CHO<sub>745</sub>) were compared to CHO<sub>K1</sub> tau E14 C291/322A cells. The sulfated prote-  
109 oglycans on the cell surface were stained using the monoclonal 10E4 antibody,  
110 whereas Hoechst was used for nuclear staining (scale bar, 15  $\mu$ m). **(d)** CHO<sub>K1</sub> cells  
111 expressing RD-GFP were transduced with monomeric or fibrillar tau E14 assemblies.  
112 The RD-GFP was stained using an anti-GFP antibody, while for the detection of the  
113 exogenously administered recombinant assemblies the tau10 antibody was deployed.  
114 Hoechst was used for staining of the nucleus (scale bar, 15  $\mu$ m). **(e)** The GFP-positive  
115 inclusions were quantified using a semi-automated image-based analysis. The number  
116 of aggregates per cell for each condition were finally compared to the monomer-treated  
117 (3 independent biological replicates with at least 800 cells per case were processed).  
118 Data represent mean values  $\pm$  SEM and were subjected to unpaired t test that was  
119 followed by Welch's correction.

## Supplementary Table S1 Summary of phosphorylated epitopes for tau AP.

Table of all phospho-sites as detected using LC-MS/MS for the two bands of the tau AP variant with distinct mobility under denaturing SDS-PAGE conditions when expressed in BG2-c6 cells. The detailed lists of the identified peptides are presented in Tables 2 and 3. Epitopes with low probability of < 25% were excluded and the ones with a probability  $\geq 25\%$  were divided in two confidence groups ( $\geq 75\%$  for high and  $25\% \leq x < 75\%$  for moderate confidence). The numbering of the epitopes is based on the longest (2N4R) human tau isoform. Epitopes marked in red correspond to sites that are phosphorylated in the high (p-band), but not in the lower molecular weight (low p-band) version of the tau AP variant.

| BG2-c6 cells                    |                                                            |                                                      |
|---------------------------------|------------------------------------------------------------|------------------------------------------------------|
|                                 | tau AP P-band                                              | tau AP low P-band                                    |
| Confidence $\geq 0.75$          | S113, S208, S214,<br>S262, S285, S356,<br>Y394, S400, T403 | S113, S208, S214,<br>S262, S285, S356,               |
| $0.25 \leq$ Confidence $< 0.75$ | S191, S195, Y197,<br>S198, S210, T263,<br>S412, T414, S416 | S191, S195, Y197,<br>S198, S210, S412,<br>T414, S416 |



## Supplementary Table S2 Tau AP p-band

The amino acids marked in red correspond to serine or threonine residues from the original tau wt variant that are mutated to alanine for the tau AP variant. Green marked epitopes correspond to oxidized residues, while yellow and grey marking (accompanied with site identification in italics) correspond to phosphorylated epitopes with high (probability  $\geq 75\%$ ) and moderate confidence ( $25\% \leq \text{probability} < 75\%$ ), respectively.

| Sequence                                                                                                     | Site                       | Modification    | m/z      | Charge (z) | Mass (Da) |
|--------------------------------------------------------------------------------------------------------------|----------------------------|-----------------|----------|------------|-----------|
| <sup>2</sup> AEPRQEFV <b>M</b> EDHAGTYGLGDR <sup>23</sup>                                                    | M11                        | Oxidation (M)   | 855.715  | 3          | 2564.123  |
| <sup>6</sup> QEFV <b>M</b> EDHAGTYGLGDR <sup>23</sup>                                                        | M11                        | Oxidation (M)   | 690.634  | 3          | 2068.879  |
| <sup>6</sup> QEFV <b>M</b> EDHAGTYGLGDR <sup>24</sup>                                                        | M11                        | Oxidation (M)   | 733.332  | 3          | 2196.974  |
| <sup>24</sup> KDQGGYT <b>M</b> HQDQEGDTDAGLK <sup>44</sup>                                                   | M31                        | Oxidation (M)   | 770.669  | 3          | 2308.986  |
| <sup>25</sup> DQGGYT <b>M</b> HQDQEGDTDAGLK <sup>44</sup>                                                    | M31                        | Oxidation (M)   | 727.971  | 3          | 2180.892  |
| <sup>25</sup> DQGGYT <b>M</b> HQDQEGDTDAGLK*AEEAGIGD <b>A</b> PSLEDE-AAGHV <b>T</b> QAR <sup>126</sup>       | M31                        | Oxidation (M)   | 912.205  | 5          | 4555.990  |
| <sup>103</sup> AEEAGIGD <b>A</b> PSLEDEAAGHV <b>T</b> QAR <sup>126</sup>                                     | S113                       | Phospho (STY)   | 825.365  | 3          | 2473.075  |
| <sup>181</sup> APPSSGEPKSGDRSGYS <b>A</b> PG <b>A</b> PG <b>A</b> PSR <sup>209</sup>                         | <i>S191/S195/Y197/S198</i> | Phospho (STY)   | 721.655  | 3          | 2161.945  |
| <sup>195</sup> SGYS <b>A</b> PG <b>A</b> PG <b>S</b> SR <sup>209</sup>                                       | S208                       | Phospho (STY)   | 1024.861 | 2          | 2047.708  |
| <sup>195</sup> SGYS <b>A</b> PG <b>A</b> PG <b>S</b> RSR <b>A</b> PS <b>L</b> P <b>A</b> PPTR <sup>221</sup> | <i>S208/S210, S214</i>     | 2 Phospho (STY) | 766.737  | 3          | 2297.189  |
| <sup>210</sup> SR <b>A</b> PS <b>L</b> P <b>A</b> PPTR <b>E</b> PK <sup>224</sup>                            | S214                       | Phospho (STY)   | 842.432  | 2          | 1682.851  |
| <sup>212</sup> AP <b>S</b> LP <b>A</b> PPTR <b>E</b> PK <sup>224</sup>                                       | S214                       | Phospho (STY)   | 480.913  | 3          | 1439.717  |
| <sup>241</sup> SRLQTAPV <b>M</b> PD <b>L</b> K <sup>254</sup>                                                | M250                       | Oxidation (M)   | 784.926  | 2          | 1567.839  |
| <sup>241</sup> SRLQTAPV <b>M</b> PD <b>L</b> KNV <b>K</b> <sup>257</sup>                                     | M250                       | Oxidation (M)   | 637.355  | 3          | 1909.045  |
| <sup>243</sup> LQTAPV <b>M</b> PD <b>L</b> K <sup>254</sup>                                                  | M250                       | Oxidation (M)   | 663.360  | 2          | 1324.706  |
| <sup>243</sup> LQTAPV <b>M</b> PD <b>L</b> KNV <b>K</b> <sup>257</sup>                                       | M250                       | Oxidation (M)   | 556.311  | 3          | 1665.912  |
| <sup>258</sup> SKIG <b>S</b> TENLKHQPGGG <b>K</b> <sup>274</sup>                                             | S262                       | Phospho (STY)   | 637.356  | 3          | 1909.046  |
| <sup>260</sup> IG <b>S</b> TENL <b>K</b> <sup>267</sup>                                                      | S262                       | Phospho (STY)   | 471.220  | 2          | 940.426   |
| <sup>260</sup> IG <b>S</b> TENLKHQPGGG <b>K</b> <sup>274</sup>                                               | S262                       | Phospho (STY)   | 534.926  | 3          | 1601.756  |
| <sup>260</sup> IGSTENLKHQPGGGKVQI <b>I</b> NK <sup>280</sup>                                                 | <i>S262/T263</i>           | Phospho (STY)   | 766.737  | 3          | 2297.189  |
| <sup>281</sup> KLDL <b>S</b> NVQ <b>S</b> K <sup>290</sup>                                                   | S285                       | Phospho (STY)   | 401.720  | 4          | 1602.849  |
| <sup>354</sup> IG <b>S</b> LDNITHVPGGGN <b>K</b> <sup>369</sup>                                              | S356                       | Phospho (STY)   | 829.898  | 2          | 1657.782  |
| <sup>354</sup> IG <b>S</b> LDNITHVPGGGN <b>K</b> K <sup>370</sup>                                            | S356                       | Phospho (STY)   | 596.299  | 3          | 1785.877  |
| <sup>384</sup> AKTDHGAEIV <b>Y</b> KAPVVS <b>G</b> DT <b>A</b> PR <sup>406</sup>                             | Y394                       | Phospho (STY)   | 616.307  | 4          | 2461.200  |
| <sup>384</sup> AKTDHGAEIV <b>Y</b> KAPVVS <b>G</b> DT <b>A</b> PR <sup>406</sup>                             | T403                       | Phospho (STY)   | 616.307  | 4          | 2461.200  |

|                                                                                                 |                              |               |          |   |          |
|-------------------------------------------------------------------------------------------------|------------------------------|---------------|----------|---|----------|
| <sup>386</sup> TDHGAEIVYKAPVWSGDTSPR <sup>406</sup>                                             | T403                         | Phospho (STY) | 755.030  | 3 | 2262.068 |
| <sup>396</sup> APVVS <sup>406</sup> SGDTAPR                                                     | S400                         | Phospho (STY) | 575.268  | 2 | 1148.523 |
| <sup>396</sup> APVVS <sup>406</sup> GTAPR                                                       | T403                         | Phospho (STY) | 575.268  | 2 | 1148.523 |
| <sup>407</sup> HLSNVSSTGSIDM <sup>438</sup> VDA <sup>438</sup> PQLATLADEVSA <sup>438</sup> SLAK | M419/S412/S413/T414/<br>S416 | Phospho (STY) | 1135.184 | 3 | 3402.530 |

## Supplementary Table S3 Tau AP non(p)-band

The amino acids marked in red correspond to serine or threonine residues from the original tau wt variant that are mutated to alanine for the tau AP variant. Green marked epitopes correspond to oxidized residues, while yellow and grey marking (accompanied with site identification in italics) correspond to phosphorylated epitopes with high (probability  $\geq 75\%$ ) and moderate confidence ( $25\% \leq$  probability  $< 75\%$ ), respectively.

| Sequence                                                                                                     | Site                            | Modification    | m/z      | Charge (z) | Mass (Da) |
|--------------------------------------------------------------------------------------------------------------|---------------------------------|-----------------|----------|------------|-----------|
| <sup>2</sup> AEPRQEFV <b>M</b> EDHAGTYGLGDR <sup>23</sup>                                                    | M11                             | Oxidation (M)   | 855.715  | 3          | 2564.123  |
| <sup>6</sup> QEFV <b>M</b> EDHAGTYGLGDR <sup>23</sup>                                                        | M11                             | Oxidation (M)   | 690.634  | 3          | 2068.879  |
| <sup>6</sup> QEFV <b>M</b> EDHAGTYGLGDR <sup>24</sup>                                                        | M11                             | Oxidation (M)   | 733.332  | 3          | 2196.974  |
| <sup>24</sup> KDQGGYT <b>M</b> HQDQEGDTDAGLK <sup>44</sup>                                                   | M31                             | Oxidation (M)   | 578.253  | 4          | 2308.986  |
| <sup>25</sup> DQGGYT <b>M</b> HQDQEGDTDAGLK <sup>44</sup>                                                    | M31                             | Oxidation (M)   | 727.971  | 3          | 2180.892  |
| <sup>25</sup> DQGGYT <b>M</b> HQDQEGDTDAGLK*AEEAGIGD <b>A</b> PSLEDE-AAGHVTQAR <sup>126</sup>                | M31                             | Oxidation (M)   | 912.205  | 5          | 4555.990  |
| <sup>103</sup> AEEAGIGD <b>A</b> PSLEDEAAGHVTQAR <sup>126</sup>                                              | S113                            | Phospho (STY)   | 825.365  | 3          | 2473.075  |
| <sup>181</sup> <b>A</b> PPSSGEPKSGDRSGYS <b>A</b> PG <b>A</b> PGSR <sup>209</sup>                            | <i>S191/S195/Y197/S198</i>      | Phospho (STY)   | 721.655  | 3          | 2161.945  |
| <sup>195</sup> SGYS <b>A</b> PG <b>A</b> PGSR <sup>209</sup>                                                 | S208                            | Phospho (STY)   | 1024.861 | 2          | 2047.708  |
| <sup>195</sup> SGYS <b>A</b> PG <b>A</b> PGSR <b>S</b> R <b>A</b> PS <b>L</b> P <b>A</b> PPTR <sup>221</sup> | <i>S208/S210, S214</i>          | 2 Phospho (STY) | 766.737  | 3          | 2297.189  |
| <sup>210</sup> <b>S</b> R <b>A</b> PS <b>L</b> P <b>A</b> PPTR <sup>224</sup>                                | S210                            | Phospho (STY)   | 842.432  | 2          | 1682.851  |
| <sup>210</sup> <b>S</b> R <b>A</b> PS <b>L</b> P <b>A</b> PPTR <sup>224</sup>                                | S214                            | Phospho (STY)   | 842.432  | 2          | 1682.851  |
| <sup>212</sup> <b>A</b> PS <b>L</b> P <b>A</b> PPTR <sup>224</sup>                                           | S214                            | Phospho (STY)   | 480.913  | 3          | 1439.717  |
| <sup>241</sup> SRLQTAPV <b>M</b> PDLK <sup>254</sup>                                                         | M250                            | Oxidation (M)   | 784.926  | 2          | 1567.839  |
| <sup>241</sup> SRLQTAPV <b>M</b> PDLKNVK <sup>257</sup>                                                      | M250                            | Oxidation (M)   | 637.355  | 3          | 1909.045  |
| <sup>243</sup> LQTAPV <b>M</b> PDLK <sup>254</sup>                                                           | M250                            | Oxidation (M)   | 663.360  | 2          | 1324.706  |
| <sup>243</sup> LQTAPV <b>M</b> PDLKNVK <sup>257</sup>                                                        | M250                            | Oxidation (M)   | 556.311  | 3          | 1665.912  |
| <sup>258</sup> SKIG <b>S</b> TENLKHQPGGGK <sup>274</sup>                                                     | S262                            | Phospho (STY)   |          |            |           |
| <sup>260</sup> IG <b>S</b> TENLK <sup>267</sup>                                                              | S262                            | Phospho (STY)   | 471.220  | 2          | 940.426   |
| <sup>260</sup> IG <b>S</b> TENLKHQPGGGK <sup>274</sup>                                                       | S262                            | Phospho (STY)   | 766.737  | 3          | 2297.189  |
| <sup>281</sup> KLDL <b>S</b> NVQSK <sup>290</sup>                                                            | S285                            | Phospho (STY)   |          |            |           |
| <sup>354</sup> IG <b>S</b> LDNITHVPGGGNK <sup>369</sup>                                                      | S356                            | Phospho (STY)   | 829.898  | 2          | 1657.782  |
| <sup>354</sup> IG <b>S</b> LDNITHVPGGGNK <sup>370</sup>                                                      | S356                            | Phospho (STY)   | 596.299  | 3          | 1785.877  |
| <sup>407</sup> HLSNVSS <b>T</b> GSID <b>M</b> V <b>D</b> APQLATLADEV <b>S</b> ASLAK <sup>438</sup>           | <i>M419/S412/S413/T414/S416</i> | Phospho (STY)   | 1135.184 | 3          | 3402.530  |

**Figure 1 Raw WB images**

**d**

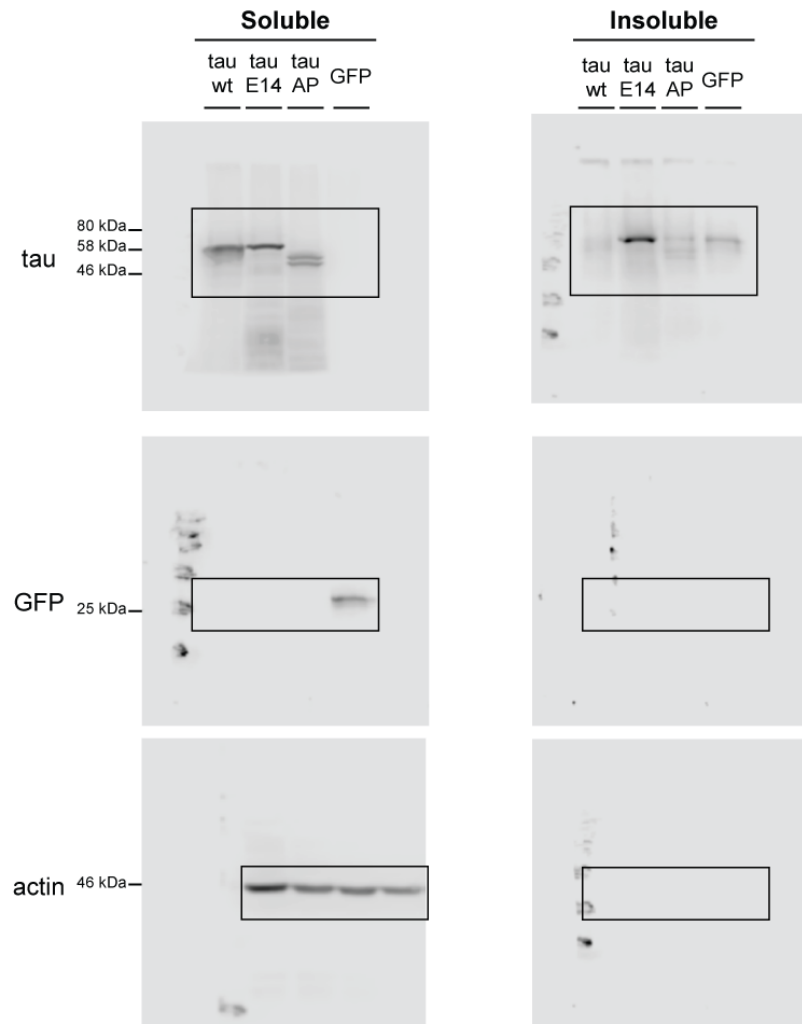

**Figure 2 Raw WB images Part 1**

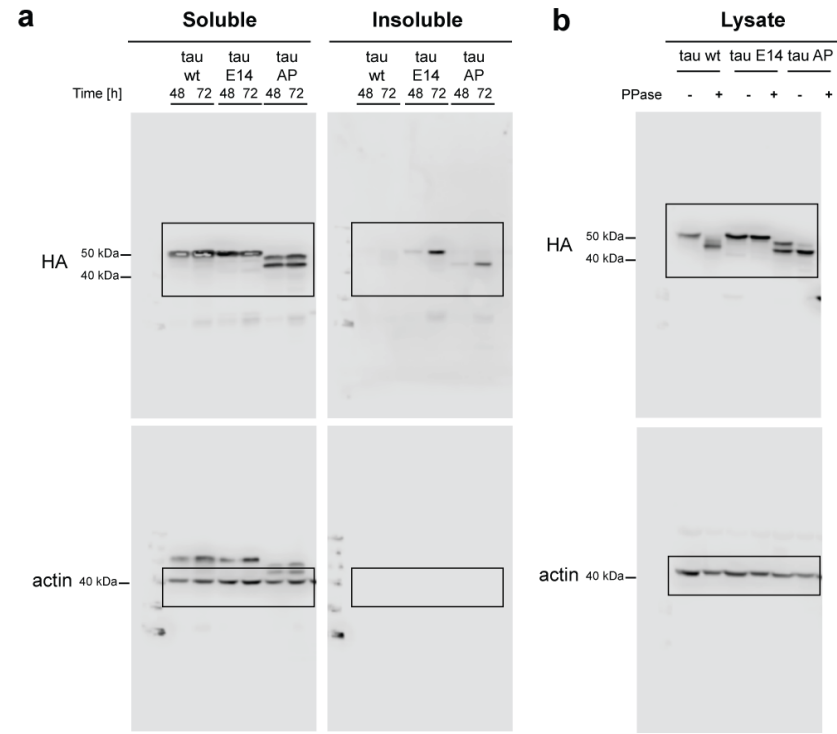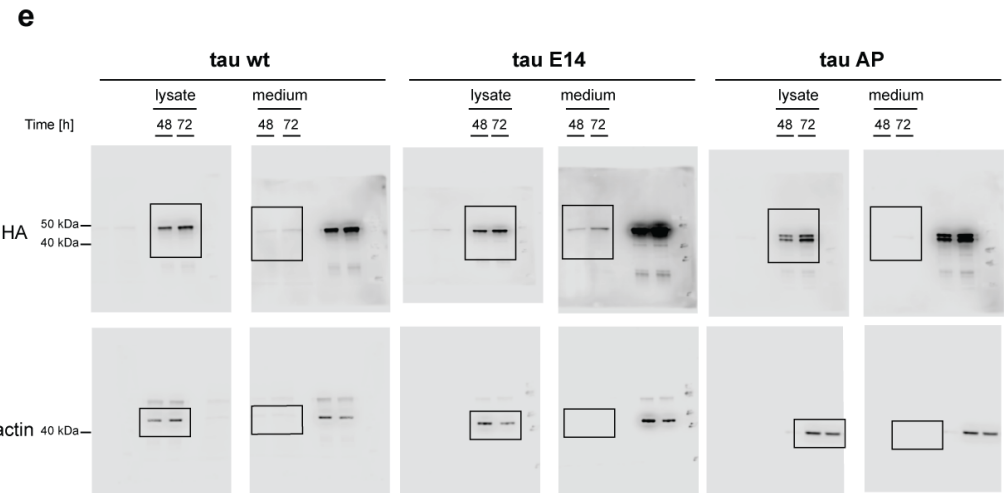

**Figure 2 Raw WB images**  
**Multiple exposures**

**e**

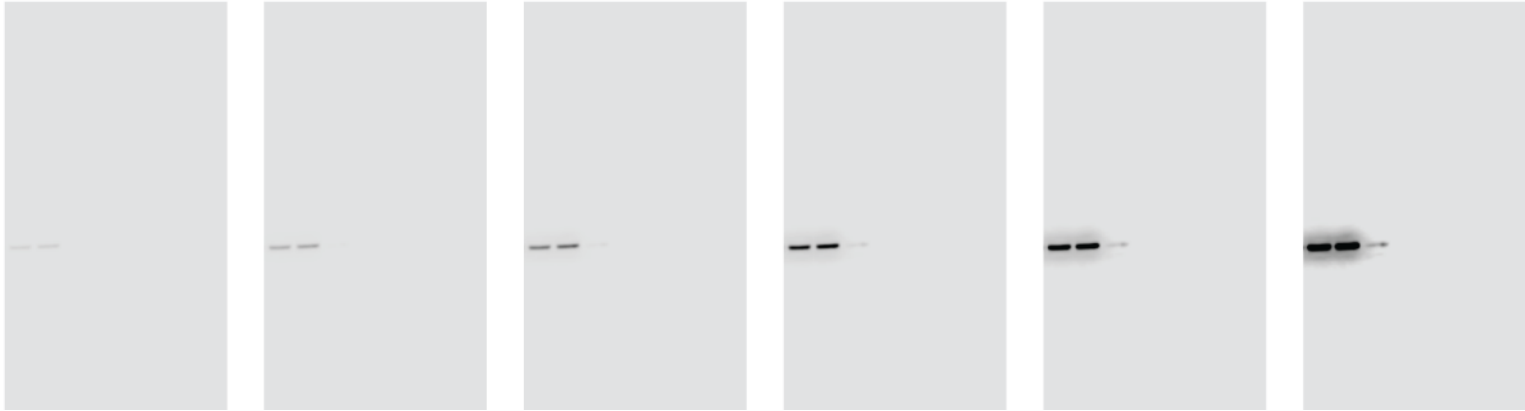

# Figure 3 Raw WB images Part 1

**b**

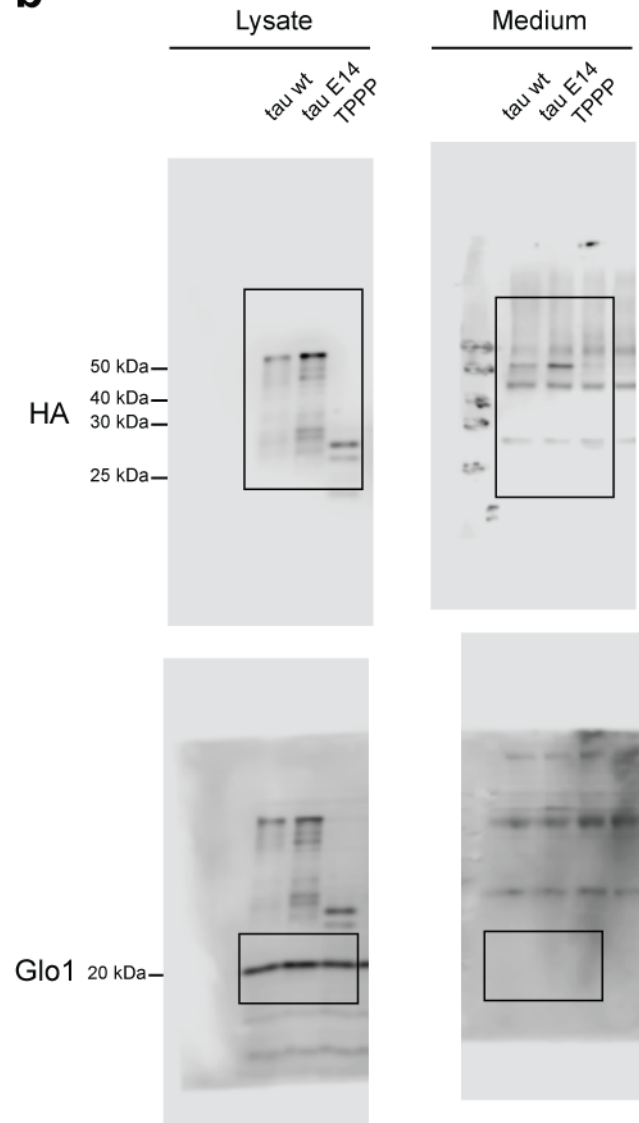

**d**

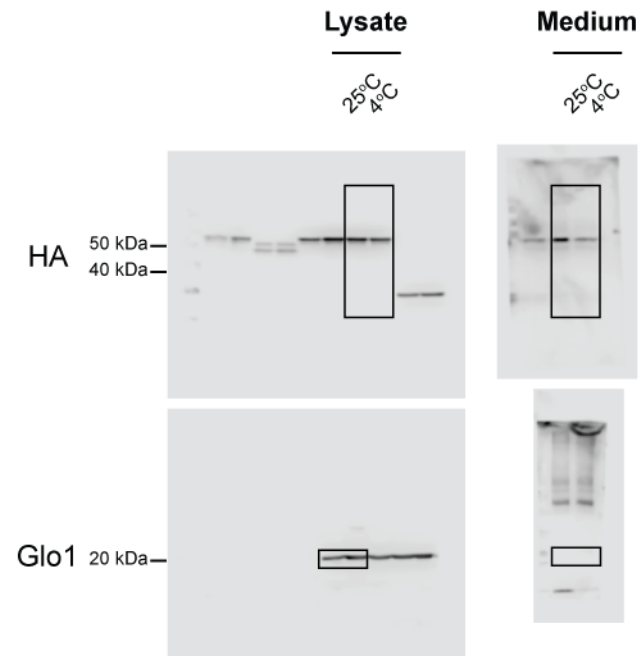

**Figure 3 Raw WB images Part 2**

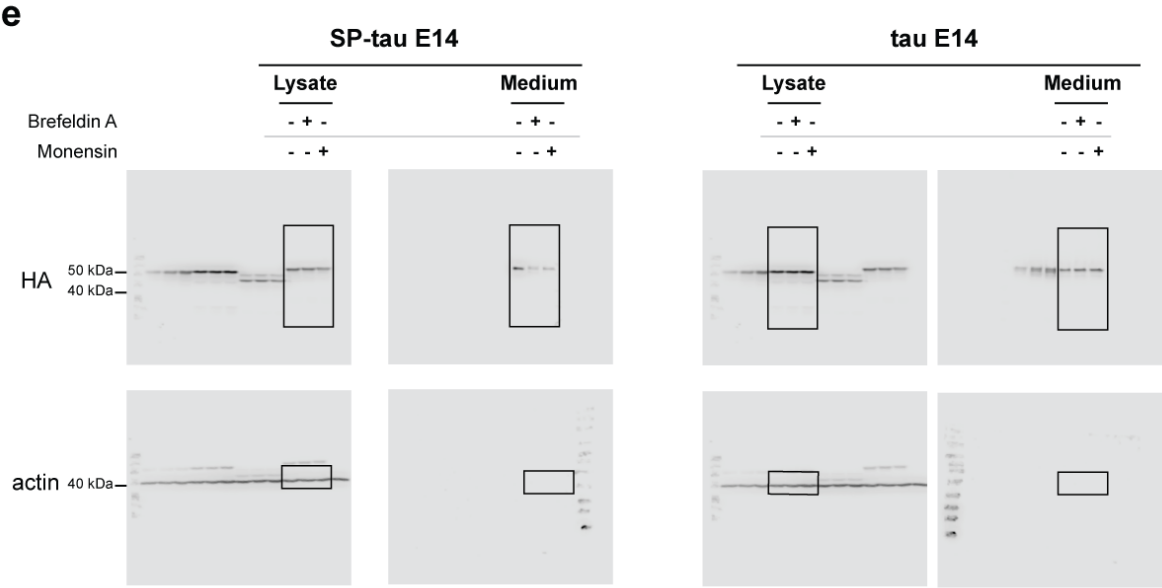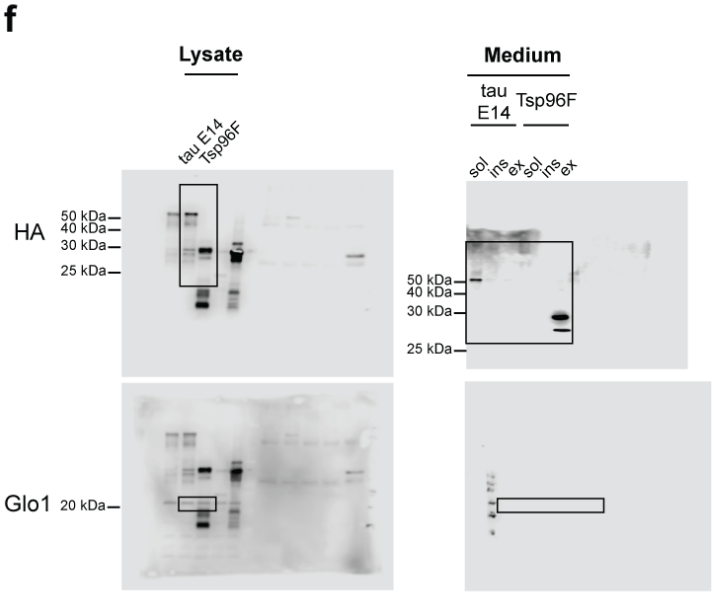



### Figure 3 Raw WB images Part 3 Multiple exposures

f

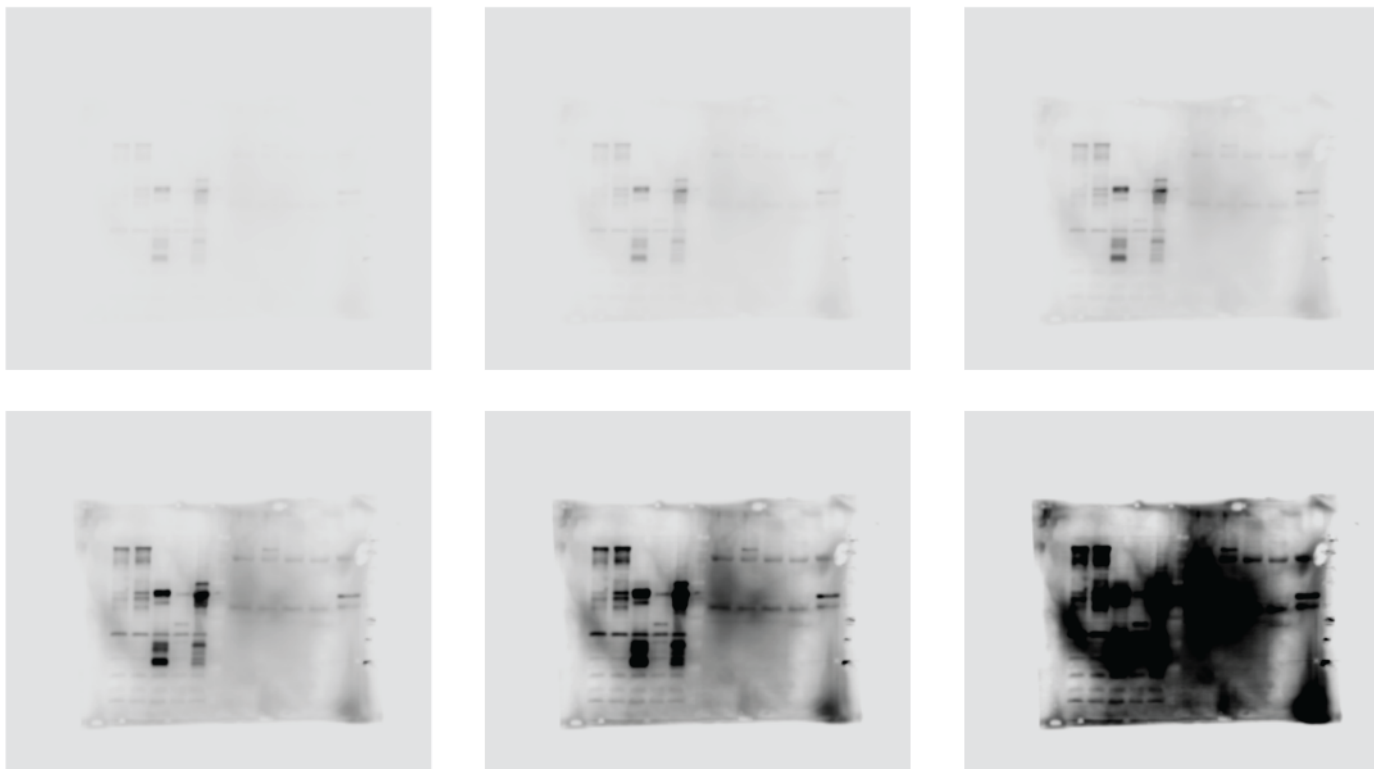

**Figure 4 Raw WB images**

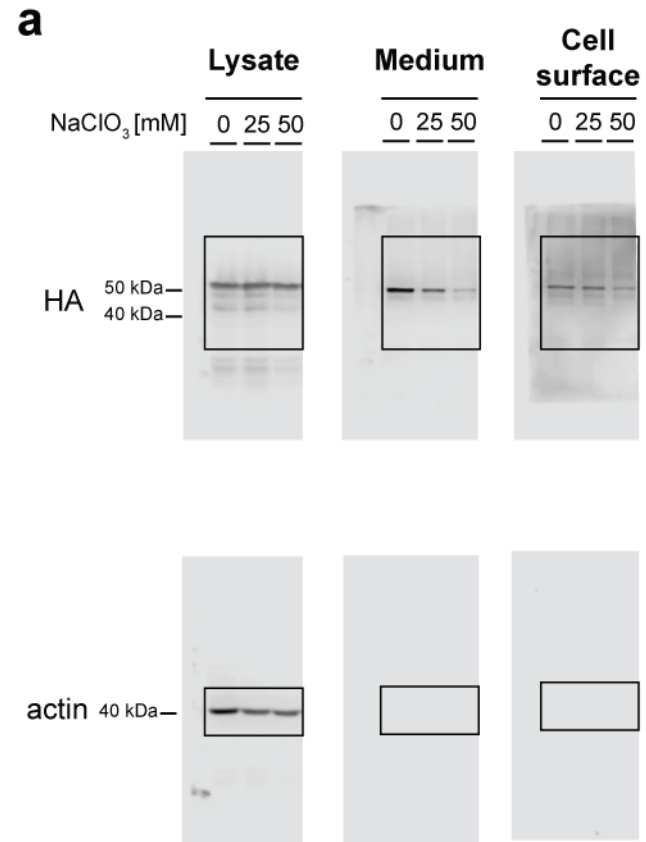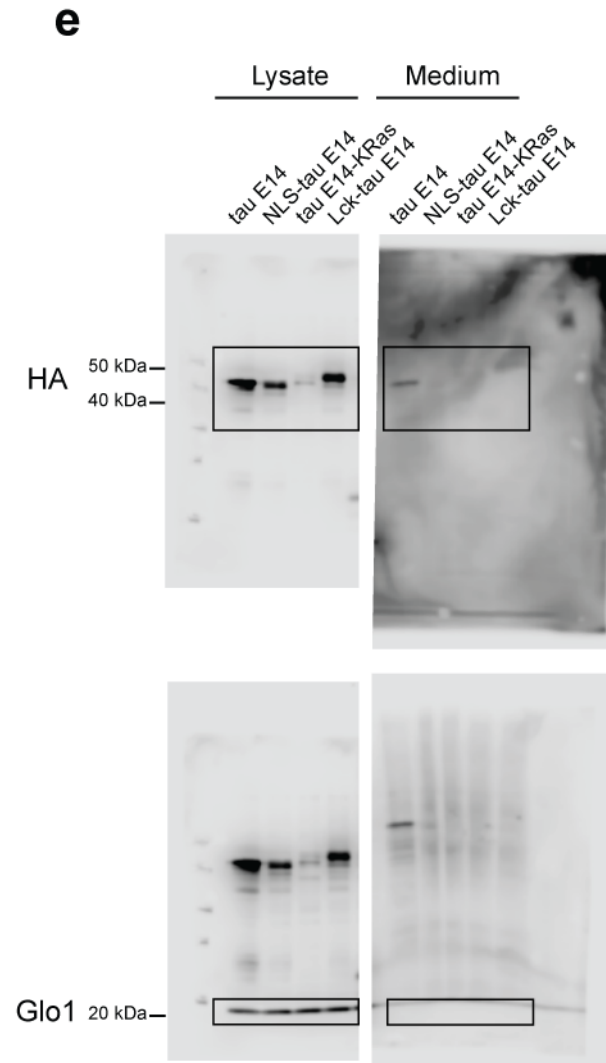

**Figure 4 Raw WB images**  
**Multiple exposures**

**a**

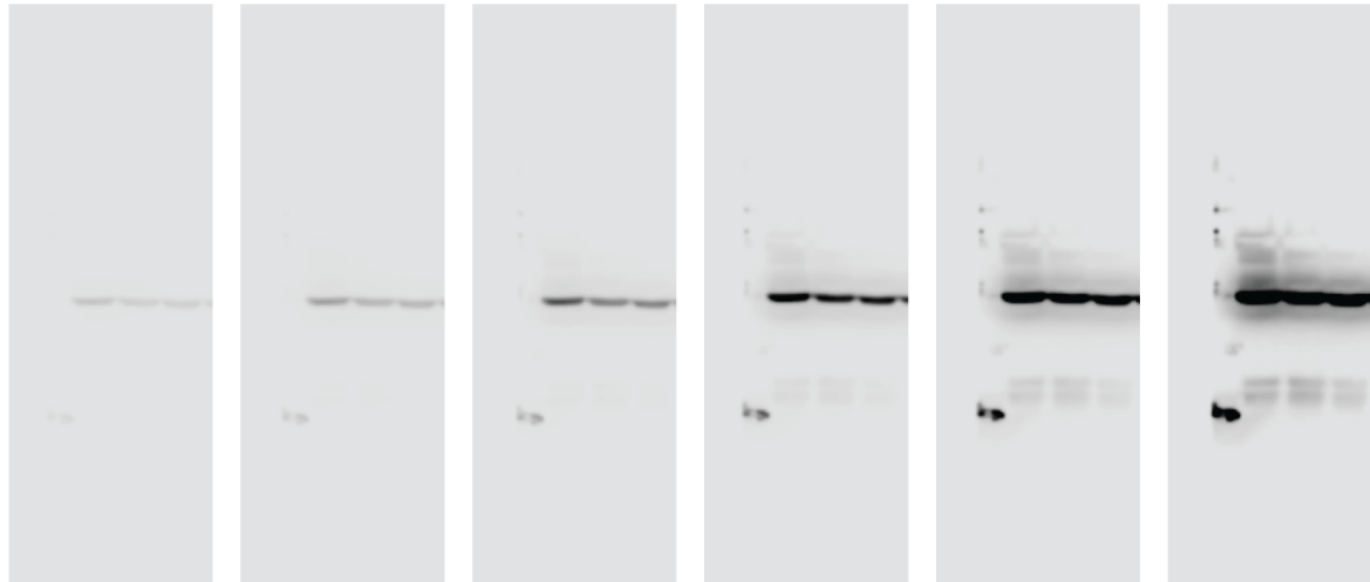

**Figure 5 Raw WB images**

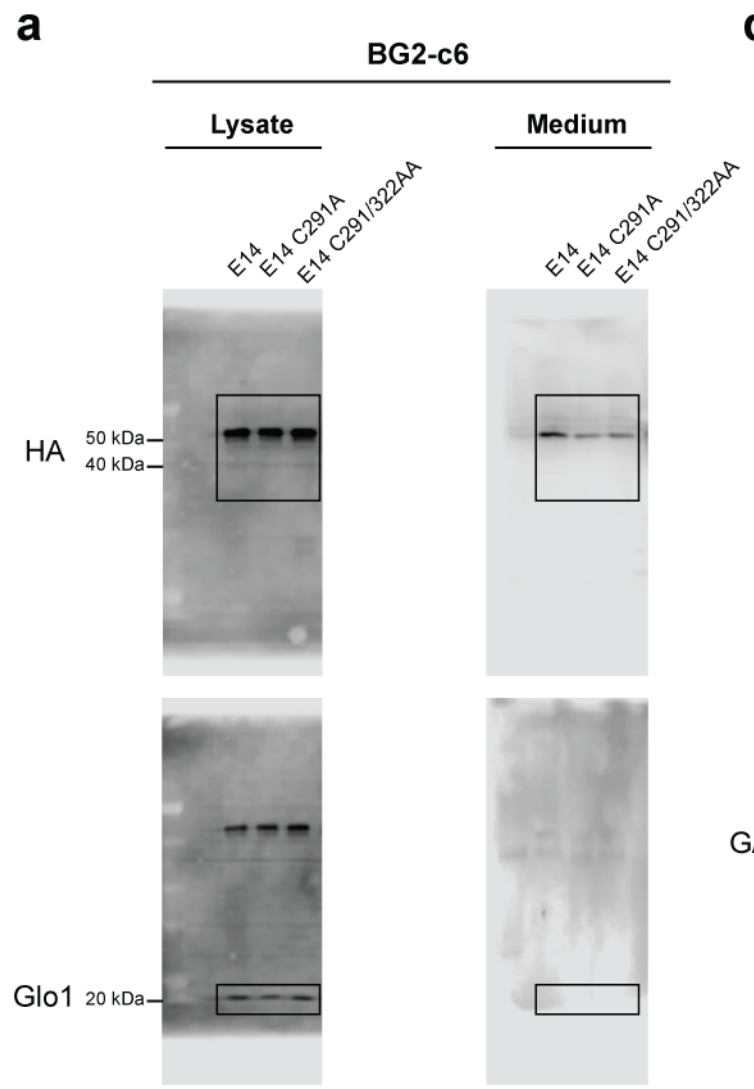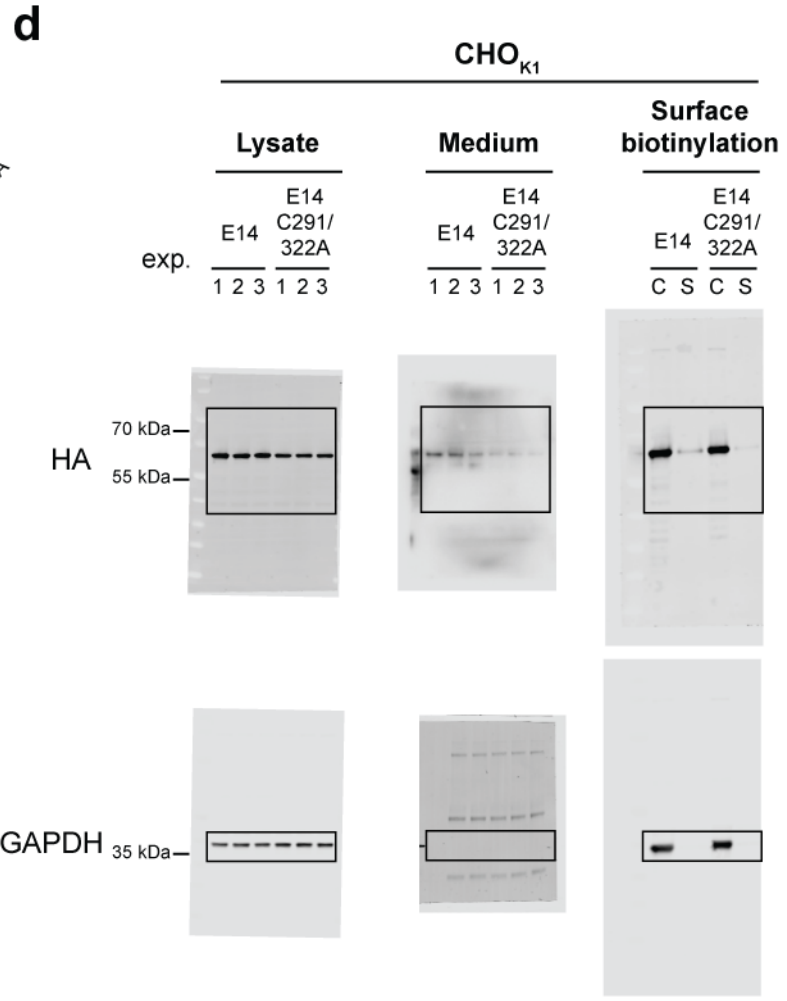

**Figure S1 Raw WB images Part 1**

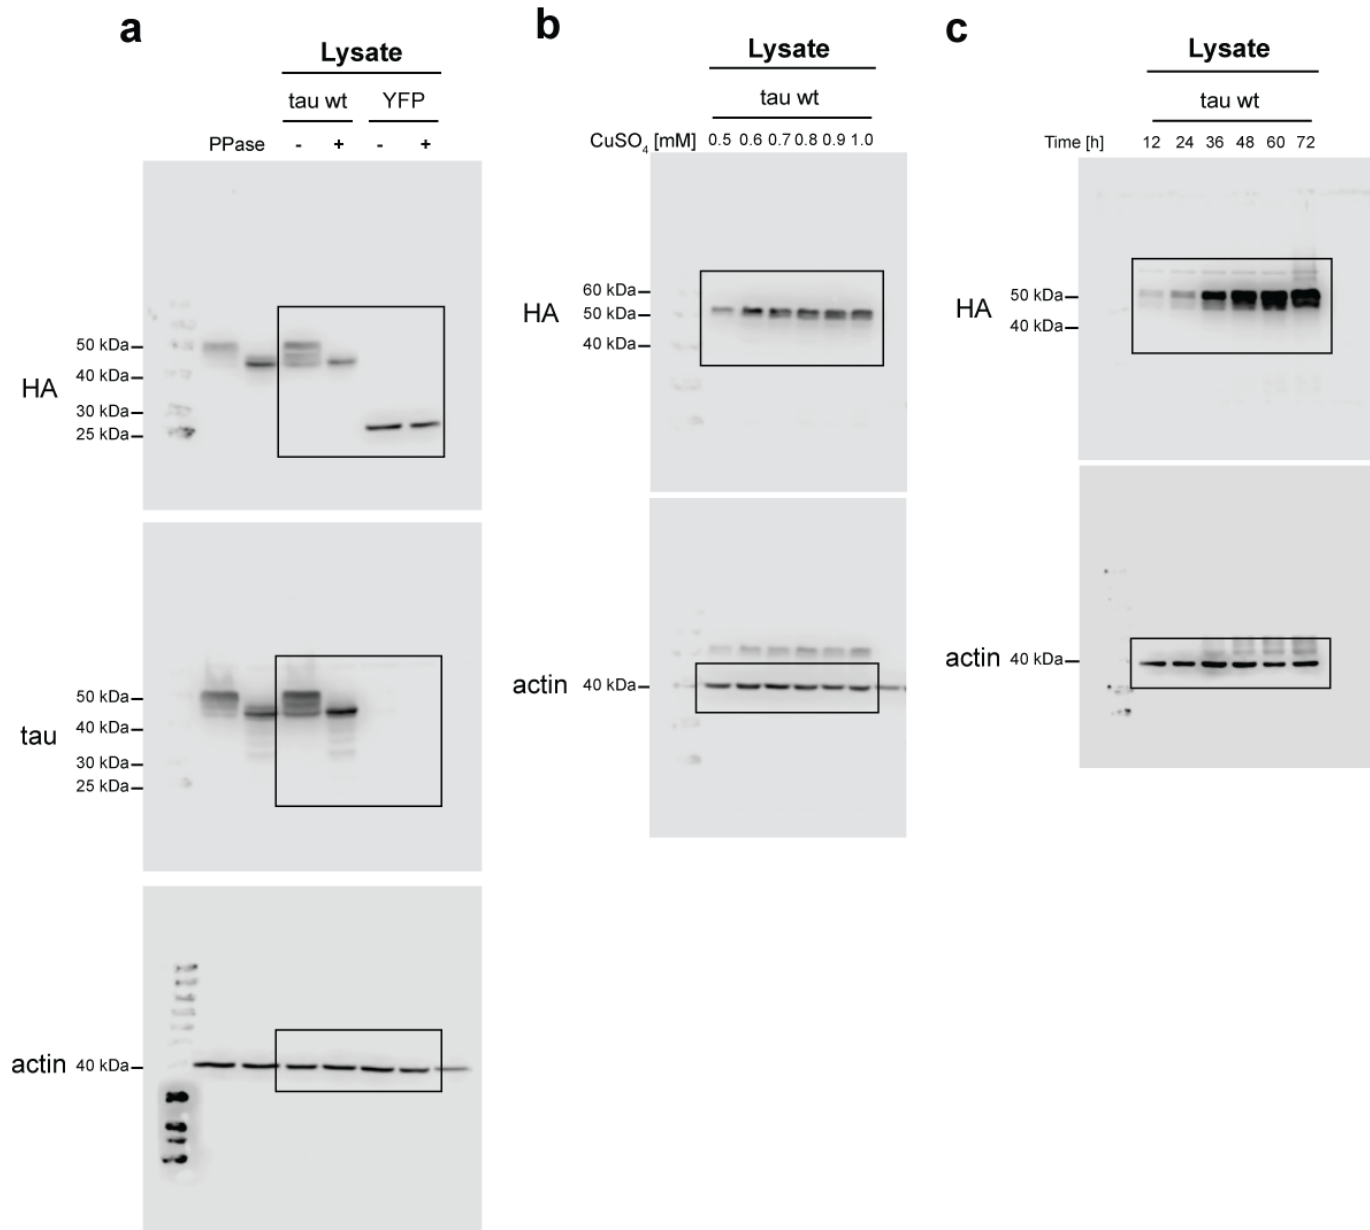

# Figure S1 Raw WB images Part 2

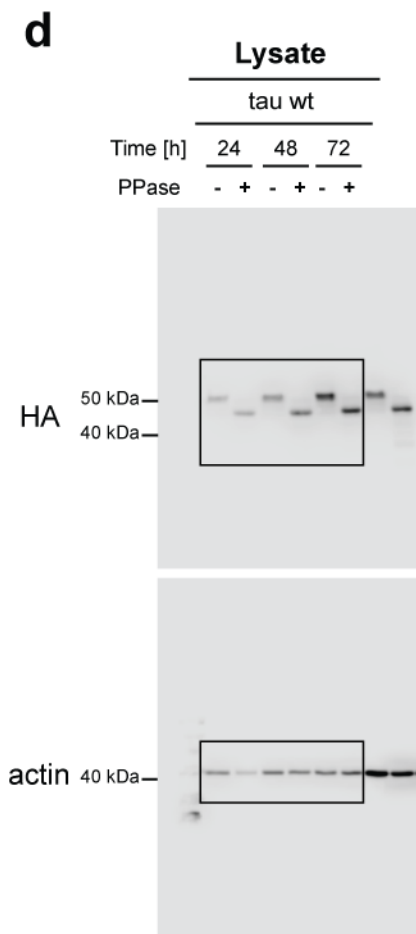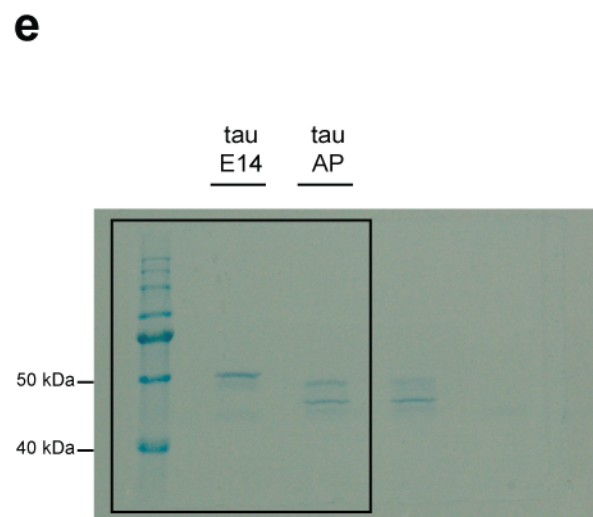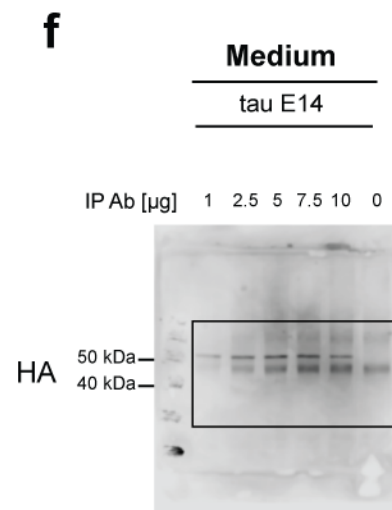

**Figure S1 Raw WB images Part 3**  
**Multiple exposures**

**d**

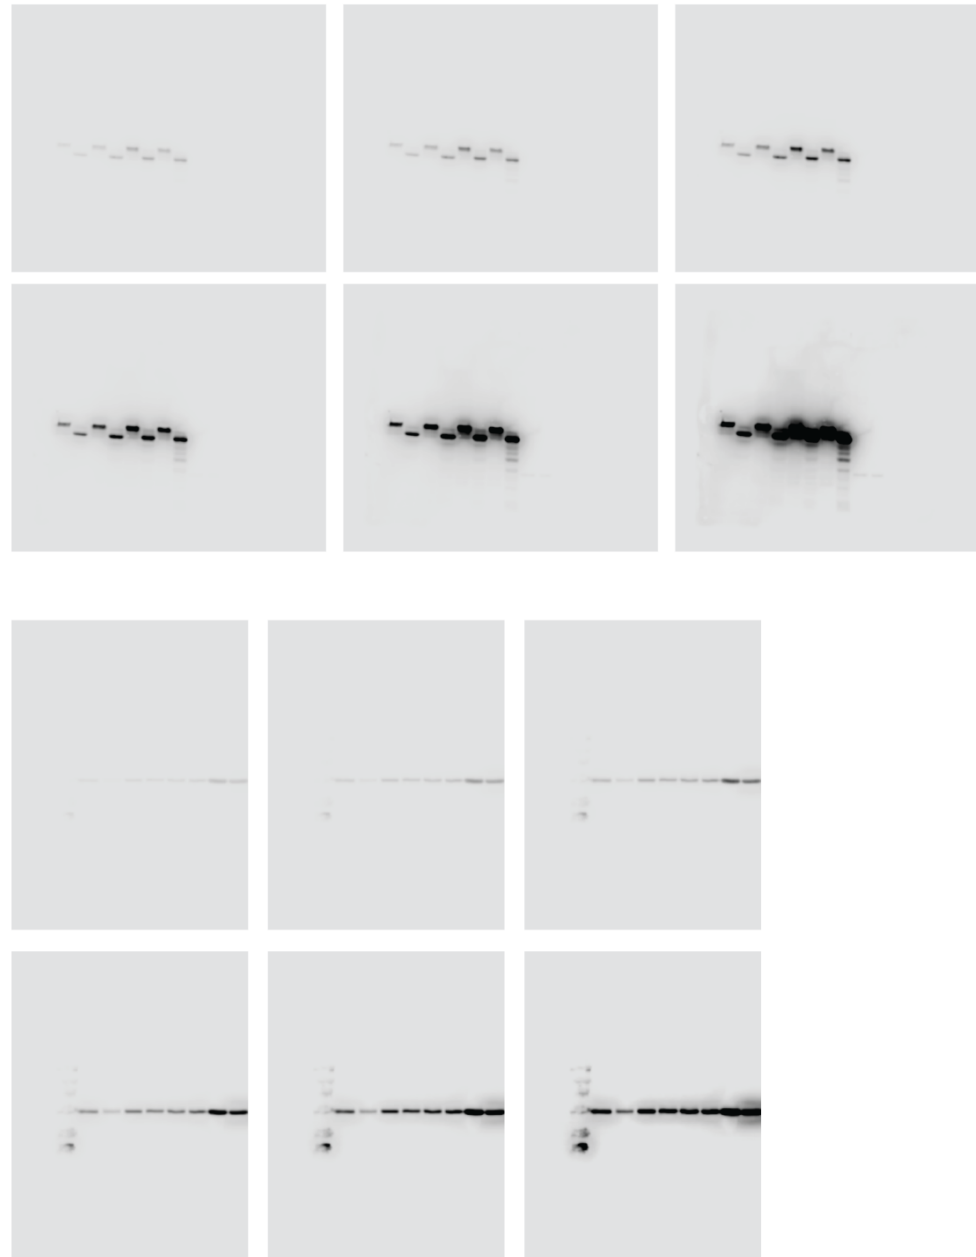

# Figure S3 Raw WB images

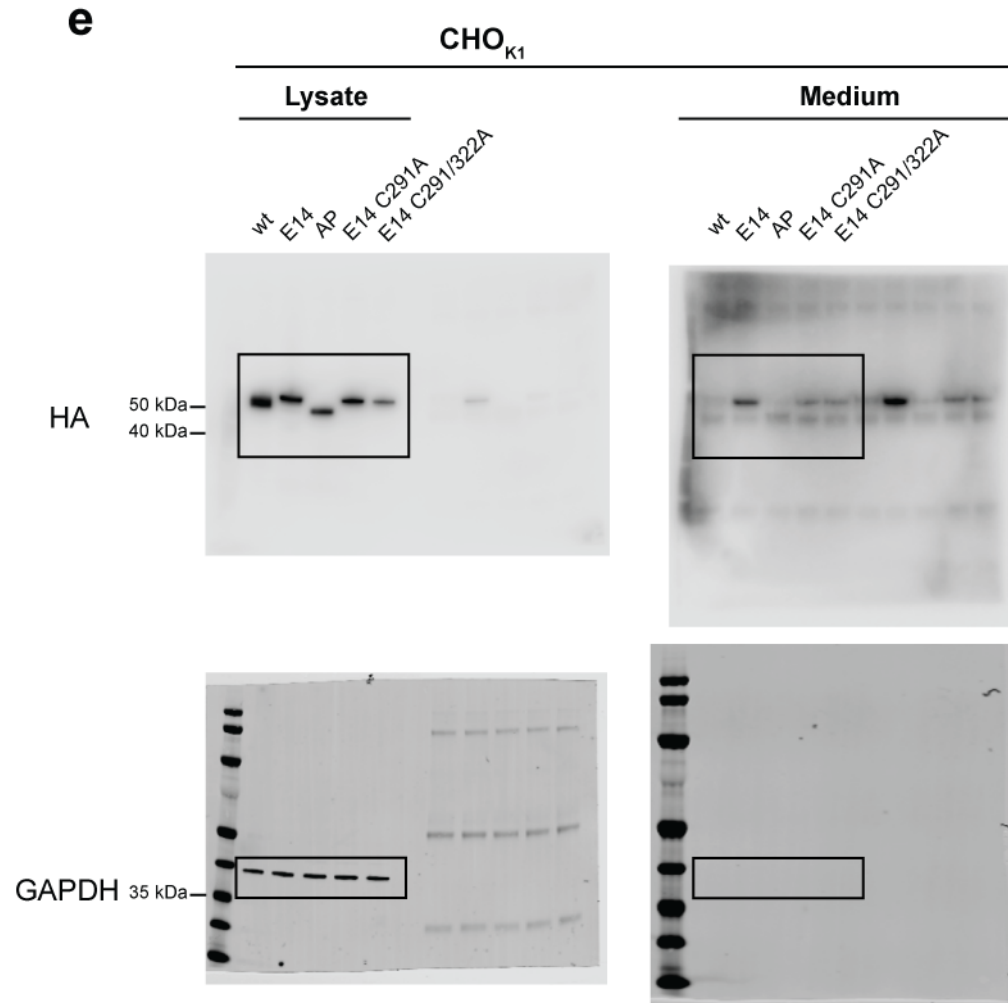

Supplement: 41598_2021_92433_MOESM1_ESM.pdf [file 41598_2021_92433_MOESM1_ESM.pdf]
